# Supplementary material for: Ab initio study of oxygen atom transfer from hydrogen peroxide to trimethylamine
Source: Royal Society of Chemistry journal article supplement (doi:10.1039/b104902j), 2001-01-01
Supplement: b104902j.doc [file b104902j.doc]

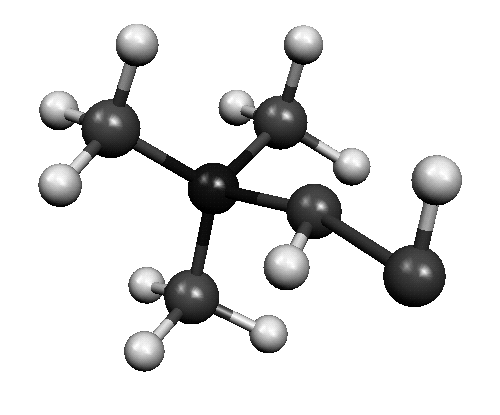
**Fig.1** Transition structure (TS-1) for oxygen transfer from H2O2 to TMA.


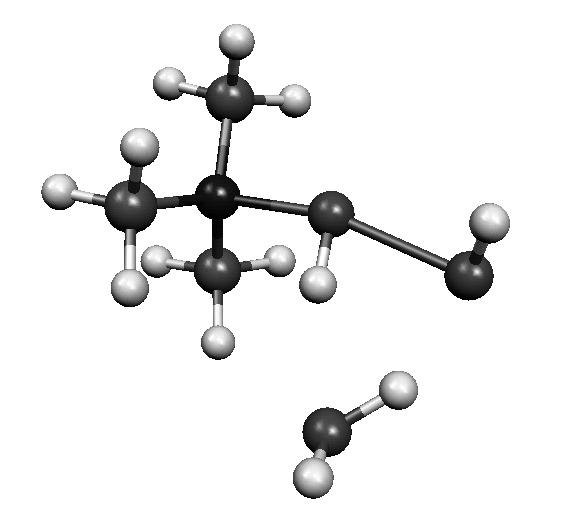
**Fig.2** Transition structure (TS-1) for oxygen transfer from H2O2 to TMA with one water molecule.


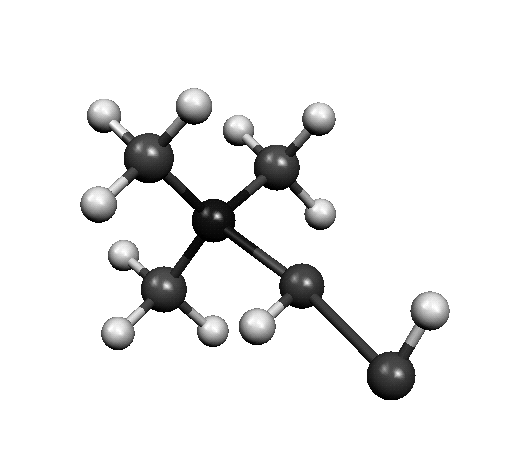
**Fig.3** Transition structure (TS-1) for oxygen transfer from H2O2 to TMA in continuum bulk water.

The HF/6-31+G*

################################################

H2O

SCF Done: E(RHF) = -76.0017743164

Zero-point correction= 0.022911 (Hartree/Particle)

3

O 0.000000 0.113368 0.000000

H 0.759416 -0.453545 0.000000

H -0.759416 -0.453395 0.000000

################################################

H2O2

SCF Done: E(RHF) = -150.771127627

Zero-point correction= 0.029306 (Hartree/Particle)

4

H 1.019051 0.623389 0.440377

O 0.687566 -0.115486 -0.055027

O -0.687541 0.115407 -0.055114

H -1.019249 -0.622757 0.440751

################################################

TMA

SCF Done: E(RHF) = -173.272906412

Zero-point correction= 0.129211 (Hartree/Particle)

13

C 1.205739 -0.677610 0.059314

N -0.000002 -0.000008 -0.361348

C -1.189709 -0.705361 0.059309

C -0.016018 1.382985 0.059323

H -2.070335 -0.208075 -0.331069

H -1.175814 -1.716721 -0.330763

H -1.285408 -0.761893 1.149149

H 1.215486 -1.688823 -0.331245

H 1.302514 -0.732405 1.149144

H 2.074596 -0.159744 -0.330649

H -0.898824 1.876501 -0.330893

H 0.854966 1.896954 -0.331062

H -0.017238 1.494180 1.149144

################################################

TMAO

SCF Done: E(RHF) = -248.057814247

Zero-point correction= 0.135603 (Hartree/Particle)

14

C 0.251019 1.374676 -0.410304

N -0.000012 -0.000015 0.066070

C 1.065023 -0.904688 -0.410375

C -1.316029 -0.469926 -0.410372

O -0.000010 -0.000059 1.433934

H -0.526593 2.006242 -0.010913

H 1.201792 1.690459 -0.011063

H 0.258178 1.414545 -1.493793

H 0.863183 -1.886069 -0.011300

H 1.096092 -0.930695 -1.493867

H 2.000683 -0.546970 -0.010794

H -1.474083 -1.459186 -0.011026

H -2.064959 0.195467 -0.011037

H -1.354209 -0.483584 -1.493861

################################################

TMA---H2O2

SCF Done: E(RHF) = -324.056497258

Zero-point correction= 0.161234 (Hartree/Particle)

17

N 0.838796 0.011259 -0.014372

O -1.954215 0.836899 -0.113819

O -2.586243 -0.389896 0.109302

C 1.708120 1.156804 -0.212944

C 1.065087 -1.009421 -1.021532

C 0.967841 -0.529149 1.328238

H 1.477594 1.923677 0.516985

H 1.549078 1.572291 -1.201145

H 2.765274 0.896936 -0.115961

H 0.902678 -0.593346 -2.009077

H 2.080328 -1.412400 -0.982376

H 0.367601 -1.825718 -0.878226

H 1.975033 -0.904130 1.526786

H 0.264046 -1.340603 1.464971

H 0.739612 0.240213 2.055933

H -1.024798 0.586178 -0.118885

H -3.090636 -0.507335 -0.684843

################################################

TMAO---H2O

SCF Done: E(RHF) = -324.092584652

Zero-point correction= 0.162253

17

C 0.376703 -1.212803 0.787286

N 0.620179 -0.000025 -0.024689

O -0.229990 -0.000337 -1.097914

C 2.004938 -0.000111 -0.536255

C 0.376574 1.213195 0.786571

O -2.795988 0.000393 0.007734

H -0.649231 -1.192621 1.118440

H 0.529915 -2.068589 0.148764

H 1.051732 -1.243053 1.634391

H 2.128671 0.878746 -1.148855

H 2.715125 0.000249 0.282155

H 2.128833 -0.879404 -1.148199

H 0.529688 2.068625 0.147552

H -0.649364 1.193130 1.117736

H 1.051573 1.244028 1.633682

H -3.527101 -0.002950 -0.593362

H -1.992565 -0.000118 -0.523647

################################################

TMA---H2O2---H2O

SCF Done: E(RHF) = -400.083504926

Zero-point correction= 0.187221 (Hartree/Particle)

20

C 1.045314 0.739428 1.286403

N 1.195252 0.055656 0.011317

C 2.387851 -0.772744 -0.005908

O -1.018069 -1.736216 -0.481203

C 1.192017 1.002233 -1.094164

O -2.078631 -1.202518 0.252255

H -0.294505 -1.124503 -0.287853

H -2.197970 -1.830443 0.953004

H 1.243357 0.465399 -2.034539

H 0.277044 1.578751 -1.076260

H 2.040539 1.689137 -1.045214

H 0.136942 1.326829 1.282781

H 1.887614 1.403681 1.495214

H 0.983241 0.011105 2.087375

H 2.451735 -1.308190 -0.946090

H 2.342751 -1.501085 0.795636

H 3.300770 -0.184919 0.116306

O -2.273579 1.746090 -0.023683

H -2.324091 0.797994 0.048322

H -3.003047 2.014305 -0.564842

################################################

TMAO---H2O---H2O

SCF Done: E(RHF) = -400.125487726

Zero-point correction= 0.189154 (Hartree/Particle)

20

C 0.727564 -0.831888 -1.170607

N 1.119089 -0.011283 -0.002258

C 2.576516 0.225458 -0.012507

C 0.722822 -0.692936 1.250604

O 0.498711 1.204613 -0.073156

O -2.242576 1.489435 0.069228

O -2.590683 -1.317745 -0.039220

H -1.276879 1.433005 0.057025

H -2.479945 2.139357 -0.577375

H 0.967596 -0.034568 2.069373

H -0.340796 -0.863913 1.219114

H 1.249686 -1.634704 1.347424

H -0.336554 -0.996213 -1.127629

H 1.252597 -1.779550 -1.155202

H 0.980478 -0.272962 -2.058030

H 2.813722 0.851141 0.833273

H 2.817541 0.751685 -0.922495

H 3.116105 -0.712411 0.041584

H -2.655311 -0.361623 -0.021092

H -3.426891 -1.654478 0.250083

################################################

TS-1

SCF Done: E(RHF) = -323.941381283

Zero-point correction= 0.157226 (Hartree/Particle)

17

C 1.105563 -0.094866 1.411287

N 0.717305 0.007052 0.009618

O -1.028160 -0.166677 -0.123578

O -2.920798 0.108935 -0.023390

C 1.088940 1.282503 -0.592848

C 1.177611 -1.130754 -0.778135

H -1.368083 0.566547 0.397534

H -3.260189 -0.703661 0.327422

H 0.679286 1.331703 -1.591108

H 0.676225 2.093399 -0.007280

H 2.170144 1.393555 -0.635408

H 0.689937 0.737492 1.963966

H 2.187926 -0.082439 1.519207

H 0.713703 -1.015127 1.819943

H 0.782960 -1.045951 -1.779995

H 0.801899 -2.041199 -0.334336

H 2.264026 -1.163044 -0.813358

################################################

TS-2

SCF Done: E(RHF) = -399.985061205

Zero-point correction= 0.185970 (Hartree/Particle)

20

C 1.278258 -0.934765 -1.165911

N 1.140839 -0.060808 -0.005503

C 2.046414 1.080494 -0.058940

C 1.234641 -0.784782 1.259785

O -0.426844 0.741389 -0.022016

O -2.225255 1.344657 0.066808

O -2.450719 -1.262417 0.065483

H -0.948440 -0.061820 -0.075505

H -2.312923 1.969739 -0.639339

H 1.037073 -0.098412 2.070066

H 0.491341 -1.569816 1.280702

H 2.223314 -1.221158 1.383289

H 0.545567 -1.728242 -1.107803

H 2.273211 -1.372840 -1.206017

H 1.104220 -0.359699 -2.064430

H 1.830385 1.737989 0.770419

H 1.880907 1.619759 -0.980494

H 3.082761 0.755324 -0.008311

H -2.726252 -0.328429 0.112569

H -3.000370 -1.671448 -0.588429

################################################

B3LYP/6-31+G*

################################################

H2O

SCF Done: E(RB+HF-LYP) = -76.4225723195

Zero-point correction= 0.021103 (Hartree/Particle)

3

O 0.000000 0.117286 0.000000

H 0.771131 -0.469119 0.000000

H -0.771131 -0.469170 0.000000

################################################

H2O2

SCF Done: E(RB+HF-LYP) = -151.547708255

Zero-point correction= 0.026265 (Hartree/Particle)

4

H -1.024056 -0.665204 0.436695

O -0.718649 0.118486 -0.054597

O 0.718666 -0.118525 -0.054555

H 1.023921 0.665514 0.436526

################################################

TMA

SCF Done: E(RB+HF-LYP) = -174.481752857

Zero-point correction= 0.120787 (Hartree/Particle)

13

C -1.123531 -0.819746 0.060705

N 0.000014 -0.000070 -0.371662

C -0.148315 1.382726 0.060660

C 1.271836 -0.562925 0.060680

H 0.678680 1.984436 -0.332310

H -1.085585 1.794111 -0.330078

H -0.158441 1.489632 1.165506

H -2.057400 -0.407501 -0.337290

H -1.214625 -0.877227 1.165516

H -1.008579 -1.838726 -0.325066

H 2.096845 0.042419 -0.330885

H 1.378923 -1.580310 -0.331540

H 1.370141 -0.606671 1.165512

################################################

TMAO

SCF Done: E(RB+HF-LYP) = -249.635450850

Zero-point correction= 0.126055 (Hartree/Particle)

14

C -1.388606 -0.276492 -0.422341

N -0.000167 0.000015 0.083801

C 0.455584 1.340387 -0.420749

C 0.934607 -1.064080 -0.419910

O -0.001906 0.000209 1.453817

H -1.687217 -1.244468 -0.019824

H -2.035658 0.499546 -0.013381

H -1.419279 -0.278460 -1.517871

H 1.450904 1.511889 -0.010734

H 0.469952 1.367964 -1.516240

H -0.233335 2.083115 -0.018341

H 1.917852 -0.844883 -0.003619

H 0.578825 -2.015235 -0.023777

H 0.964865 -1.080131 -1.515358

################################################

TMA---H2O2

SCF Done: E(RB+HF-LYP) = -326.045731530

Zero-point correction= 0.149815 (Hartree/Particle)

17

C 0.877557 -0.685713 1.273953

N 0.790739 0.012017 -0.012843

C 1.020355 -0.905305 -1.131549

C 1.706624 1.153868 -0.062675

O -1.854359 0.896535 -0.095179

O -2.507053 -0.396329 0.103783

H -0.894755 0.600416 -0.102444

H -3.085807 -0.418267 -0.677360

H 1.582040 1.683929 -1.012628

H 1.473714 1.846628 0.752345

H 2.763898 0.844708 0.030423

H 0.651453 0.014268 2.084351

H 1.882077 -1.113691 1.446012

H 0.138726 -1.491774 1.302132

H 0.895331 -0.368509 -2.077676

H 0.287259 -1.716716 -1.093757

H 2.034960 -1.343858 -1.108707

################################################

TMAO-H2O

SCF Done: E(RB+HF-LYP) = -326.078338536

Zero-point correction= 0.150999 (Hartree/Particle)

17

C -0.302293 1.229232 0.786679

N -0.584459 0.000000 -0.032876

O 0.211577 0.000003 -1.164946

C -2.017933 -0.000005 -0.467695

C -0.302285 -1.229231 0.786678

O 2.655475 -0.000004 0.007996

H 0.752660 1.204403 1.060996

H -0.495240 2.090320 0.146356

H -0.941669 1.250690 1.675359

H -2.169978 -0.889842 -1.078600

H -2.685361 -0.000018 0.400454

H -2.169991 0.889841 -1.078584

H -0.495243 -2.090320 0.146359

H 0.752672 -1.204403 1.060980

H -0.941652 -1.250683 1.675365

H 3.430868 0.000000 -0.570718

H 1.852801 0.000040 -0.586208

################################################

TMA---H2O2---H2O

SCF Done: E(RB+HF-LYP) = -402.480182565

Zero-point correction= 0.174566 (Hartree/Particle)

20

C 1.001726 0.788995 1.269831

N 1.118031 0.042821 0.009768

C 2.324228 -0.790859 0.000128

O -0.907384 -1.807335 -0.289408

C 1.093567 0.954351 -1.142946

O -2.134619 -1.126051 0.098912

H -0.213770 -1.079058 -0.154708

H -2.329040 -1.552166 0.951591

H 1.122445 0.370270 -2.068767

H 0.169604 1.538055 -1.119106

H 1.957415 1.643207 -1.134987

H 0.087220 1.387614 1.255395

H 1.864788 1.460982 1.427387

H 0.956168 0.085027 2.108040

H 2.366702 -1.366832 -0.930071

H 2.294387 -1.492253 0.840549

H 3.245110 -0.185673 0.080521

O -2.064160 1.725845 -0.010423

H -2.168485 0.752193 -0.025119

H -2.846579 2.084295 -0.453827

################################################

TMAO---H2O---H2O

SCF Done: E(RB+HF-LYP) = -402.519436136

Zero-point correction= 0.176188 (Hartree/Particle)

20

C 0.683375 -0.845326 -1.184789

N 1.070389 0.000473 -0.003152

C 2.554376 0.205132 0.008485

C 0.641345 -0.683115 1.265575

O 0.477429 1.248481 -0.095773

O -2.181720 1.431122 0.077272

O -2.464026 -1.273319 -0.038627

H -1.176234 1.386705 0.036978

H -2.448705 1.997406 -0.661314

H 0.866561 -0.000879 2.085629

H -0.431567 -0.867109 1.199870

H 1.180888 -1.628711 1.382872

H -0.393575 -1.008983 -1.143308

H 1.213090 -1.803013 -1.149493

H 0.954370 -0.283918 -2.079325

H 2.787358 0.837041 0.865555

H 2.815742 0.728576 -0.911254

H 3.074572 -0.755778 0.074944

H -2.548129 -0.285808 -0.011529

H -3.315125 -1.629267 0.253837

################################################

TS-1

SCF Done: E(RB+HF-LYP) = -325.986986753

Zero-point correction= 0.145721 (Hartree/Particle)

17

C 1.094742 -0.137913 1.432767

N 0.770544 0.010396 0.012847

O -1.033269 -0.206515 -0.174220

O -3.020388 0.110559 -0.022805

C 1.088570 1.331651 -0.533738

C 1.261017 -1.092925 -0.815535

H -1.530495 0.492845 0.338099

H -3.217311 -0.763287 0.354238

H 0.692262 1.396793 -1.548521

H 0.615277 2.101155 0.081020

H 2.176845 1.498006 -0.546137

H 0.616900 0.665325 1.999116

H 2.183263 -0.093350 1.593328

H 0.711223 -1.097646 1.784149

H 0.872568 -0.970815 -1.828141

H 0.887746 -2.033776 -0.406985

H 2.361196 -1.105252 -0.834857

################################################

TS-2

SCF Done: E(RB+HF-LYP) = -402.434814067

Zero-point correction= 0.172643 (Hartree/Particle)

20

C 1.267162 -0.855179 -1.219859

N 1.151847 -0.036010 -0.003415

C 1.158079 -0.832785 1.236211

O -0.373613 0.765947 -0.038913

C 2.087669 1.095637 0.027722

O -2.398557 1.270539 0.082457

O -2.296917 -1.262442 0.078445

H -0.951364 -0.033834 -0.063081

H -2.488394 1.751368 -0.755856

H 0.981039 -0.162628 2.078487

H 0.349951 -1.566015 1.188972

H 2.124273 -1.342597 1.353239

H 0.478499 -1.610468 -1.212080

H 2.249324 -1.347057 -1.256603

H 1.142252 -0.208610 -2.090105

H 1.853636 1.713659 0.895729

H 1.950478 1.687471 -0.878644

H 3.121738 0.731690 0.088141

H -2.628939 -0.282879 0.069104

H -2.770180 -1.716412 -0.633746

################################################

MP2/6-31 +G*

################################################

H2O

EUMP2 = -0.76209776547871D+02

Zero-point correction= 0.021245 (Hartree/Particle)

3

O 0.000000 0.117557 0.000000

H 0.772615 -0.470226 0.000000

H -0.772615 -0.470231 0.000000

################################################

H2O2

EUMP2 = -0.15114534566860D+03

Zero-point correction= 0.026107 (Hartree/Particle)

4

H -1.013844 -0.684139 0.424868

O -0.727288 0.119212 -0.053113

O 0.727295 -0.119232 -0.053094

H 1.013788 0.684297 0.424785

################################################

TMA

EUMP2 = -0.17383950195651D+03

Zero-point correction= 0.123372 (Hartree/Particle

13

C 1.232719 -0.627940 0.064031

N -0.000006 -0.000070 -0.391405

C -1.160216 -0.753487 0.064030

C -0.072481 1.381502 0.064048

H -2.071422 -0.286938 -0.320813

H -1.103406 -1.776241 -0.319061

H -1.228899 -0.796943 1.168792

H 1.283634 -1.650880 -0.319464

H 1.305139 -0.664456 1.168811

H 2.090017 -0.068142 -0.320271

H -0.986224 1.844162 -0.319550

H 0.787548 1.937248 -0.320066

H -0.076477 1.462225 1.168806

################################################

TMAO

EUMP2 = -0.24881504300173D+03

Zero-point correction= 0.128641 (Hartree/Particle)

14

C 1.336339 -0.447530 -0.418305

N 0.000021 0.000012 0.075496

C -1.055587 -0.933412 -0.419014

C -0.280397 1.380734 -0.419136

O -0.000571 0.000244 1.449853

H 2.070042 0.245137 -0.008190

H 1.505728 -1.441818 -0.007155

H 1.363819 -0.457662 -1.512752

H -2.001537 -0.582073 -0.009076

H -1.076364 -0.953027 -1.513403

H -0.823357 -1.914790 -0.007587

H -1.246527 1.670659 -0.008162

H 0.496721 2.024205 -0.008723

H -0.286236 1.408581 -1.513522

################################################

TMA---H2O2

EUMP2= -0.32500570374004D+03

Zero-point correction= 0.152120 (Hartree/Particle)

17

C 0.810535 -0.496819 1.344165

N 0.767232 0.033438 -0.020359

C 0.903365 -1.046901 -0.997752

C 1.802908 1.046917 -0.217765

O -1.844100 0.946009 -0.167251

O -2.405294 -0.393332 0.122233

H -0.869723 0.687633 -0.167310

H -3.035465 -0.453227 -0.621807

H 1.724783 1.453244 -1.229906

H 1.655886 1.859132 0.499225

H 2.816394 0.631346 -0.079903

H 0.669184 0.322851 2.053510

H 1.772521 -0.993785 1.558459

H -0.002972 -1.214317 1.475128

H 0.823970 -0.633531 -2.007057

H 0.096183 -1.767838 -0.847486

H 1.872920 -1.566175 -0.902086

################################################

TMAO---H2O

EUMP2 = -0.32504795335645D+03

Zero-point correction= 0.153563 (Hartree/Particle)

17

C -0.289993 1.223630 0.777222

N -0.586945 -0.000001 -0.029474

O 0.193113 -0.000008 -1.176312

C -2.018062 -0.000008 -0.444074

C -0.289980 -1.223620 0.777236

O 2.646452 0.000000 0.012117

H 0.767540 1.192453 1.038116

H -0.487670 2.079109 0.132213

H -0.921187 1.244950 1.670572

H -2.172336 -0.890278 -1.052311

H -2.668200 -0.000012 0.435915

H -2.172346 0.890260 -1.052312

H -0.487681 -2.079109 0.132246

H 0.767561 -1.192445 1.038094

H -0.921152 -1.244919 1.670604

H 3.426547 -0.000045 -0.565208

H 1.849229 0.000097 -0.590360

################################################

TMA---H2O2---H2O

EUMP2 = -0.40122983755806D+03

Zero-point correction= 0.177019 (Hartree/Particle)

20

C 0.982035 0.764801 1.271035

N 1.080704 0.023112 0.009298

C 2.257553 -0.849010 0.018442

O -0.952583 -1.792812 -0.352415

C 1.135721 0.951989 -1.125624

O -2.148950 -1.088315 0.137640

H -0.246364 -1.076503 -0.201652

H -2.304691 -1.574378 0.971021

H 1.157814 0.379065 -2.057139

H 0.244269 1.581362 -1.109251

H 2.036293 1.588155 -1.079297

H 0.102838 1.411025 1.240378

H 1.879412 1.383658 1.444087

H 0.884074 0.055589 2.098497

H 2.296838 -1.416589 -0.915644

H 2.183200 -1.551471 0.853420

H 3.191574 -0.270944 0.122198

O -1.951350 1.777002 -0.025962

H -2.095581 0.807835 -0.005364

H -2.723399 2.147737 -0.483561

################################################

TMAO---H2O---H2O

EUMP2 = -0.40127841097156D+03

Zero-point correction= 0.178971 (Hartree/Particle)

20

C 0.684827 -0.856214 -1.167816

N 1.070074 -0.001110 -0.003871

C 2.546958 0.196821 0.016721

C 0.623888 -0.648049 1.267829

O 0.484866 1.250388 -0.125614

O -2.193276 1.435123 0.070673

O -2.432217 -1.295946 -0.035119

H -1.188656 1.398852 0.026280

H -2.460835 2.039847 -0.640583

H 0.840476 0.058249 2.068562

H -0.446987 -0.831465 1.187973

H 1.162784 -1.589444 1.410968

H -0.392748 -1.008628 -1.125549

H 1.208839 -1.814994 -1.109971

H 0.966151 -0.306235 -2.065210

H 2.769493 0.842952 0.864905

H 2.812306 0.703552 -0.910201

H 3.056982 -0.766784 0.104744

H -2.550360 -0.312802 -0.018091

H -3.276974 -1.677206 0.253348

################################################

TS-1

EUMP2 = -0.32494305366009D+03

Zero-point correction= 0.148006 (Hartree/Particle)

17

C 1.083067 -0.253716 1.414129

N 0.759461 0.007906 0.012490

O -0.987813 -0.147002 -0.155128

O -2.977173 0.105411 -0.016378

C 1.085294 1.360102 -0.440854

C 1.202066 -1.041736 -0.904226

H -1.557693 0.489638 0.387144

H -3.096831 -0.828534 0.244436

H 0.658969 1.498124 -1.434818

H 0.637576 2.081258 0.245224

H 2.175157 1.500503 -0.467026

H 0.624763 0.519342 2.033622

H 2.172442 -0.248506 1.561947

H 0.670183 -1.225628 1.686218

H 0.791205 -0.827858 -1.891290

H 0.805531 -1.994847 -0.553118

H 2.299799 -1.074017 -0.942013

################################################

TS-2

EUMP2 = -0.40118061753602D+03

Zero-point correction= 0.175328 (Hartree/Particle)

20

C 1.229861 -0.898629 -1.200088

N 1.133877 -0.053536 -0.003216

C 2.088228 1.058533 0.014731

O -0.350156 0.776209 -0.054085

C 1.092346 -0.817001 1.253182

O -2.283004 1.329333 0.071143

H -0.938477 -0.009300 -0.123547

H -2.356730 1.883322 -0.728277

H 0.910065 -0.115024 2.066918

H 0.265578 -1.528160 1.201105

H 2.044334 -1.342910 1.399095

H 0.424868 -1.635328 -1.170747

H 2.202713 -1.406787 -1.219961

H 1.115693 -0.262782 -2.078645

H 1.834066 1.706363 0.854056

H 1.983196 1.617090 -0.915741

H 3.109139 0.671433 0.118563

O -2.307515 -1.263170 0.074339

H -2.618984 -0.290580 0.078696

H -2.849798 -1.708976 -0.597137

################################################

B3LYP/6-31+G* ONSAGER

################################################

H2O

Recommended a0 for SCRF calculation = 2.61 angstrom

Total energy (include solvent energy) = -76.4259810060

Zero-point correction= 0.021089 (Hartree/Particle)

3

H 0.000000 0.766308 -0.475565

O 0.000000 0.000000 0.118891

H 0.000000 -0.766308 -0.475565

################################################

H2O2

Recommended a0 for SCRF calculation = 2.76 angstrom

Total energy (include solvent energy) = -151.550263422

Zero-point correction= 0.026342 (Hartree/Particle)

4

H 1.009497 0.592204 0.550215

O 0.719179 -0.103908 -0.068777

O -0.719179 0.103907 -0.068778

H -1.009496 -0.592198 0.550221

################################################

TMA

Recommended a0 for SCRF calculation = 3.71 angstrom

Total energy (include solvent energy) = -174.481852076

Zero-point correction= 0.120769 (Hartree/Particle

13

C -1.035308 -0.928367 0.061083

N 0.000087 -0.000105 -0.373841

C -0.286509 1.360660 0.061024

C 1.321772 -0.432235 0.061109

H 0.476080 2.042955 -0.330732

H -1.260514 1.676474 -0.328985

H -0.307295 1.464258 1.165624

H -2.006674 -0.611256 -0.334495

H -1.117793 -0.994791 1.165653

H -0.819732 -1.930744 -0.325251

H 2.082385 0.252618 -0.330040

H 1.530681 -1.434238 -0.329861

H 1.422519 -0.464883 1.165672

################################################

TMAO

Recommended a0 for SCRF calculation = 3.90 angstrom

Total energy (include solvent energy) = -249.641176395

Zero-point correction= 0.126284 (Hartree/Particle)

14

C -1.392930 -0.244390 -0.423433

N -0.000113 -0.000072 0.085325

C 0.485038 1.328726 -0.422321

C 0.908521 -1.083976 -0.422760

O -0.000718 -0.000359 1.462221

H -1.714823 -1.206547 -0.024942

H -2.024469 0.547483 -0.020519

H -1.418427 -0.246007 -1.517739

H 1.487932 1.477721 -0.022072

H 0.493430 1.353399 -1.516681

H -0.185228 2.088995 -0.021133

H 1.904281 -0.878543 -0.029698

H 0.542195 -2.025800 -0.014145

H 0.917861 -1.109488 -1.517032

################################################

TMA---H2O

Recommended a0 for SCRF calculation = 4.01 angstrom

Total energy (include solvent energy) = -326.048153898

Zero-point correction= 0.149844 (Hartree/Particle)

17

C 0.988270 -0.649860 1.290756

N 0.779627 0.007746 -0.004546

C 0.974484 -0.937245 -1.111662

C 1.657561 1.175040 -0.150808

O -1.849348 0.880522 -0.043396

O -2.550480 -0.389772 0.114223

H -0.888512 0.563950 -0.028519

H -2.883157 -0.526664 -0.789908

H 1.454119 1.670232 -1.105750

H 1.459619 1.886049 0.658184

H 2.725562 0.898191 -0.121697

H 0.792111 0.063799 2.097663

H 2.018024 -1.032264 1.400549

H 0.289264 -1.485610 1.391257

H 0.764377 -0.436460 -2.062203

H 0.283192 -1.778020 -0.998924

H 2.004742 -1.331043 -1.145164

################################################

TMAO---H2O

Recommended a0 for SCRF calculation = 3.98 angstrom

Total energy (include solvent energy) = -326.084931998

Zero-point correction= 0.150306 (Hartree/Particle)

17

C -0.845803 -1.192873 -0.882153

N -0.674887 -0.000671 0.014080

O 0.584827 -0.019455 0.585935

C -1.703033 -0.048379 1.109495

C -0.854785 1.259215 -0.782865

O 3.229116 0.001613 -0.038366

H -0.079889 -1.131319 -1.655764

H -0.683144 -2.080936 -0.271696

H -1.846316 -1.203128 -1.324213

H -1.535134 0.817850 1.748797

H -2.713023 -0.034297 0.690487

H -1.529890 -0.962806 1.676210

H -0.700082 2.096137 -0.102154

H -0.088085 1.267921 -1.558139

H -1.855036 1.297086 -1.224057

H 3.431956 -0.035196 0.908034

H 2.233035 0.008344 -0.033479

################################################

TS-1

Recommended a0 for SCRF calculation = 4.04 angstrom

Total energy (include solvent energy) = -326.003380102

Zero-point correction= 0.146845 (Hartree/Particle)

17

C 1.138036 -0.133896 1.422608

N 0.762382 0.004004 0.007139

O -1.066379 -0.056081 -0.120364

O -3.072868 0.113732 -0.015102

C 1.216618 1.265856 -0.594994

C 1.127914 -1.171762 -0.794945

H -1.315767 0.703888 0.437495

H -3.113690 -0.810109 0.281044

H 0.804071 1.344457 -1.602305

H 0.865160 2.105253 0.010423

H 2.313731 1.296396 -0.640989

H 0.787663 0.738914 1.979441

H 2.229277 -0.205609 1.525708

H 0.674390 -1.035776 1.825889

H 0.731934 -1.045757 -1.804069

H 0.685943 -2.060081 -0.340580

H 2.219179 -1.281999 -0.834317

##############################################
